# Supplementary material for: Diversity of transducer-like proteins (Tlps) in Campylobacter
Source: PubMed Central journal article supplement (PMC6433261; doi:10.1371/journal.pone.0214228), 2019-03-25

- *C. avium*
- *C. concisus*
- *C. fetus*
- *C. helveticus*
- *C. lanienae*
- *C. lari*
- *C. jejuni/C. coli*

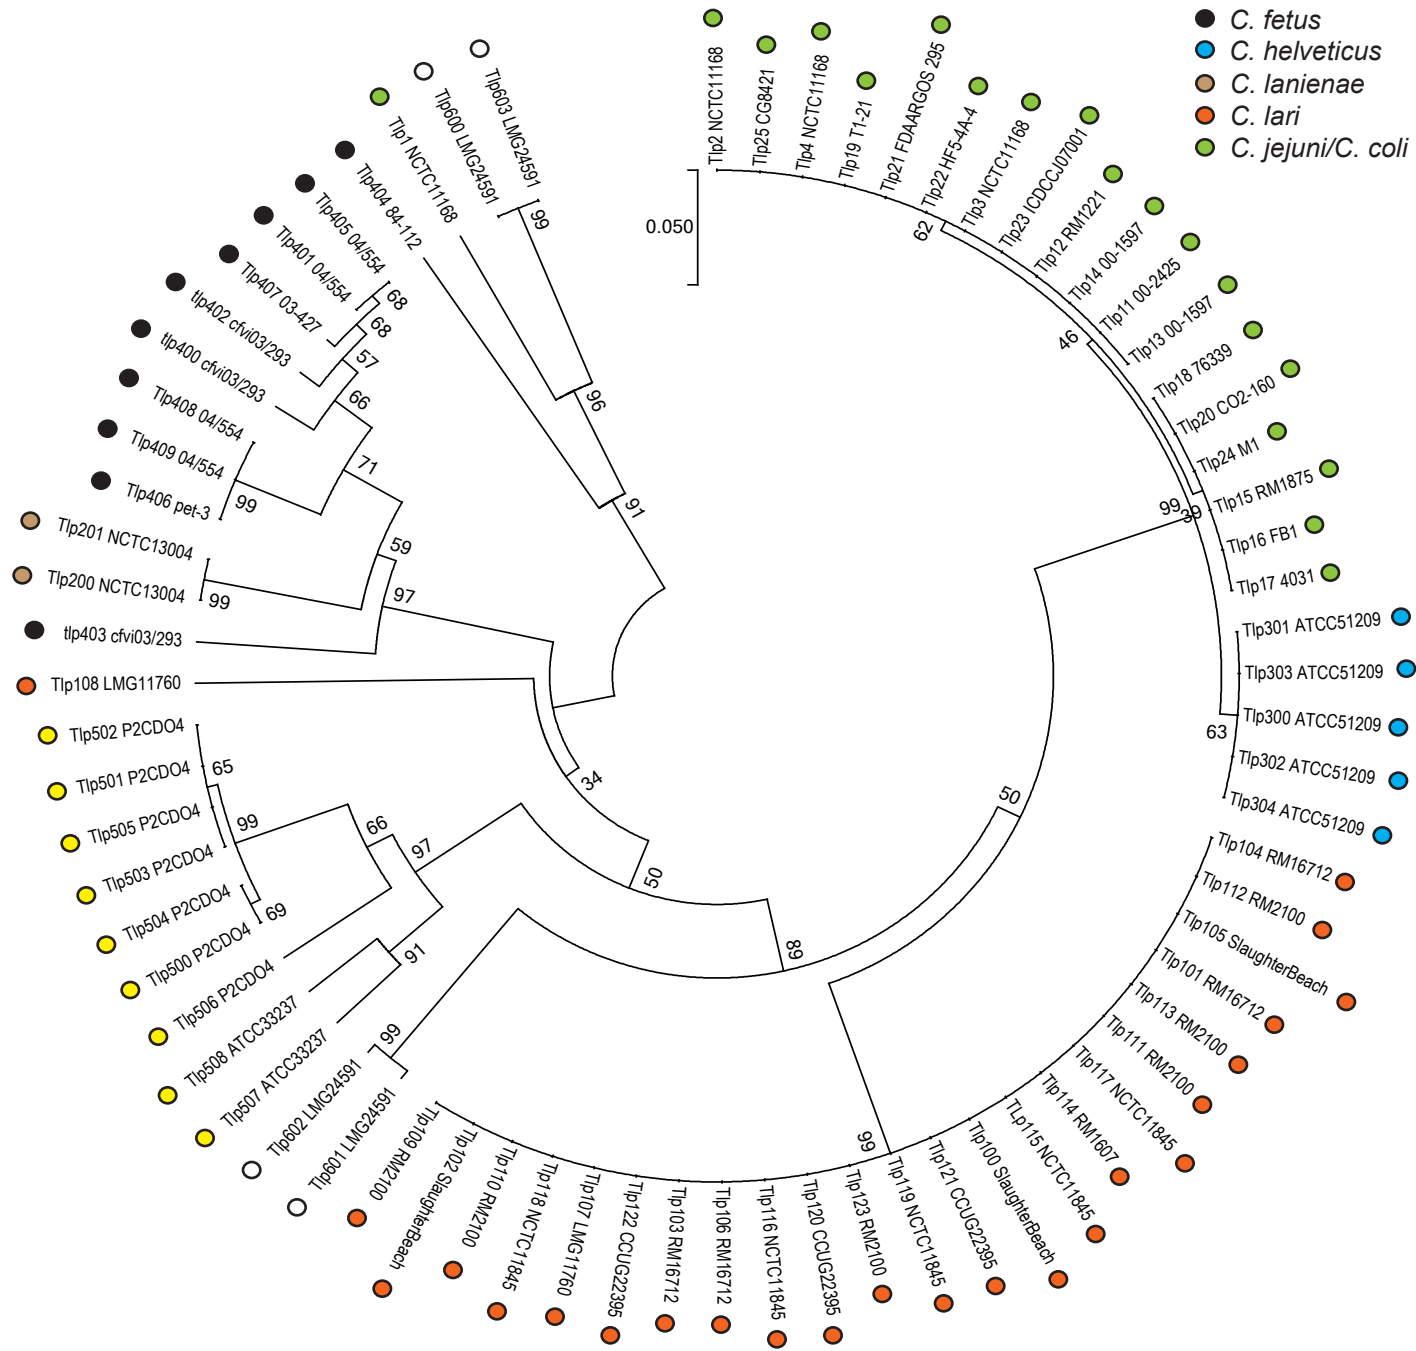

Supplement: pone.0214228.s008.pdf [file pone.0214228.s008.pdf]
